# Supplementary material for: A bioinformatic approach to identify confirmed and probable CRISPR–Cas systems in the Acinetobacter calcoaceticus–Acinetobacter baumannii complex genomes
Source: Front Microbiol. 2024 Apr 9;15:1335997. doi: 10.3389/fmicb.2024.1335997 (PMC11035748; doi:10.3389/fmicb.2024.1335997)
Supplement: Supplementary file 2 [file Table_2.XLSX]

## Sheet: Table 2
	Table 2. CRISPR‒Cas systems detected in Acb complex genomes.
		Specie	Genetic material	Number of CRISPR System	Strain	Consensus sequence of	Position	Repeat Sequence (RS)	Lenght of RS	Spacer Sequence (SS)	Lenght of SS	Size (pb)	Subtypes
						CRISPR System
		A.baumannii	Chromosome	1	10_3	GTTCTTCATCGCATAGATGATTTAGAAA	2901854-2906552	79	29	78	31	13569	I-Fa
		A.baumannii	Chromosome	2	10_4	GTTCTTCATCGCATAGATGATTTAGAAA	2908032-2912730	79	29	78	31	8950	I-Fa
		A.baumannii	Chromosome	3	11W359501	GTTCATGGCGGCATACGCCATTTAGAAA	1155089- 1158211	53	28	52	32	11334	I-Fb
		A.baumannii	Chromosome	4	36-1512	GTTCACTGCCGTATAGGCAGCTTAGAAA	1452056-1452476	8	28	7	32	4617	Undefined
		A.baumannii	Chromosome	5	3207	GTTCTTCATCGCATAGATGATTTAGAAA	3288781-3292683	66	28	65	32	14462	I-Fa
						GTTGTTCATCGCATAGATGATTTAGAAA	3297773-3299809	35	28	34	32
		A.baumannii	Chromosome	6	7804	GTTCATGGCGGCATACGCCATTTAGAAA	1355180-1358269	51	28	50	32	11699	I-Fb
		A.baumannii	Chromosome	7	7835	GTTGTTCATCGCATAGATGATTTAGAAA	3034356-3036392	35	28	34	32	14444	I-Fa
						GTTCTTCATCGCATAGATGATTTAGAAA	3041482-3045384	66	29	65	31
		A.baumannii	Chromosome	8	9102	GTTCATGGCGGCATACGCCATTTAGAAA	3234936-3238325	57	28	56	32	11661	I-Fb
		A.baumannii	Chromosome	9	40288	GTTCATGGCGGCATACGTCATTTAGAAAA	2837140-2837288	3	29	2	31	8762	I-Fb
		A.baumannii	Chromosome	10	AB43	GTTCATGGCGGCATACGCCATTTAGAAA	1050075-1056413	106	28	105	32	14610	I-Fb
		A.baumannii	Chromosome	11	AB307-0294	GTTCATGGCGGCATACGCCATTTAGAAA	1066140-1068869	46	28	45	32	11001	I-Fb
		A.baumannii	Chromosome	12	AB5075-UW	GTTCATGGCGGCATACGCCATTTAGAAA	1109908-1113030	53	29	52	29	11421	I-Fb
		A.baumannii	Chromosome	13	ab736	GTTCTTCATCGCATAGATGATTTAGAAA	3024342-3028252	66	28	65	28	9468	I-Fa
		A.baumannii	Chromosome	14	A1	GTTCATGGCGGCATACGCCATTTAGAAA	2848240-2851269	51	28	50	32	11301	I-Fb
		A.baumannii	Chromosome	15	A85	GTTCATGGCGGCATACGCCATTTAGAAA	2940329-2943478	53	28	52	32	11421	I-Fb
		A.baumannii	Chromosome	16	A388	GTTCATGGCGGCATACGCCATTTAGAAA	1173172-1176354	54	28	53	30	11481	I-Fb
		A.baumannii	Chromosome	17	A1296	GTTCTTCATCGCATAGATGATTTAGAAAT	931834-939412	126	29	125	32	27686	I-Fb
						GTTGTTCATCGCATAGATGATTTAGAAA	944501-948281	64	28	63	32
		A.baumannii	Chromosome	18	A1429	GTTGTTCATCGCATAGATGATTTAGAAA	2964973-2966295	23	28	22	32	8387	I-Fa
						GTTCTTCATCGCATAGATGATTTAGAAAA	2971385-2973303	32	29	31	31
		A.baumannii	Chromosome	19	Ab-C102	GTTCTTCATCGCATAGATGATTTAGAAAA	948309-943687	78	29	77	31	9485	I-Fa
						GTTATTCATCGCATAGATGATTTAGAAA	953867-954347	8	28	7	32
				20		GTTCATGGCGGCATACGCCATTTAGAAAAT	2684699-2690822	103	30	102	30	14885	I-Fb
		A.baumannii	Chromosome	21	AbH12O-A2	GTTCTTCATCGCATAGATGATTTAGAAA	944296-950336	102	28	101	32	17699	I-Fa
						GTTCGTCATCGCCCAGATGATTTAGAAA	955426-958579	54	28	53	32
		A.baumannii	Chromosome	22	AC1633	GTTCATGGCGGCATACGCCATTTAGAAA	113388-116719	55	28	54	32	11603	I-Fb
		A.baumannii	Chromosome	23	AF-401	GTTGTTCATCGCATAGATGATTTAGAAA	3290306-3292402	36	28	35	32	10477	I-Fa
		A.baumannii				GTTGTTCATCGCATAGATGATTTAGAAA	3299414-3301337	33	28	32	32
		A.baumannii	Chromosome	24	AR_0063	GTTCTTCATCGCATAGATGATTTAGAAA	1587393-1582411	84	28	83	32	11175	I-Fa
						GTTGTTCATCGCATAGATGATTTAGAAA	1592483-1595179	46	28	45	32
		A.baumannii	Chromosome	25	AR_0083	GTTCATGGCGGCATACGCCATTTAGAAA	41724-44933	54	28	53	32	11481	I-Fb
		A.baumannii	Chromosome	26	AR_0088	GTTCATGGCGGCATACGCCATTTAGAAA	3048746-3051836	52	28	51	32	11704	I-Fb
		A.baumannii	Chromosome	27	AR_0101	GTTCTTCATCGCATAGATGATTTAGAAA	2332658- 2337417	79	29	78	32	15284	I-Fa
						GTTGTTCATCGCATAGATGATTTAGAAA	2342370-2344526	37	28	36	32
		A.baumannii	Chromosome	28	ATCC_19606	GTTCTTCATCGCATAGATGATTTAGAAA	970281-974191	66	29	65	31	750328	I-Fa
				29		GTTCTTCATCGCATAGATGATTTAGAAA	3024367-3028040	42	28	41	32	11647	I-Fa
		A.baumannii	Chromosome	30	ATCC_17961	GTTCTTCATCGCATAGATGATTTAGAAA	3010709-3014619	66	29	65	31	12985	I-Fa
		A.baumannii	Chromosome	31	Ax270	GTTCATGGCGGCATACGCCATTTAGAAA	1056632-1059781	53	28	52	32	11421	I-Fb
		A.baumannii	Chromosome	32	D4	GTTCATGGCGGCATACGCCATTTAGAAA	3113574 -3115522	33	28	32	32	10562	I-Fb
		A.baumannii	Chromosome	33	D36	GTTCATGGCGGCATACGCCATTTAGAAA	1163020-1167910	82	28	81	32	13162	I-Fb
		A.baumannii	Chromosome	34	D46	GTTCATGGCGGCATACGCCATTTAGAAA	3012871-3015841	50	28	49	32	11584	I-Fb
		A.baumannii	Chromosome	35	DA33382	GTTCATGGCGGCATACGCCATTTAGAAA	1797953-1801342	57	28	56	32	11661	I-Fb
		A.baumannii	Chromosome	36	DETAB-P2	GTTGTTCATCGCATAGATGATTTAGAAA	2877466-2880853	57	28	56	32	18404	I-Fa
						GTTCTTCATCGCATAGATGATTTAGAAA	2885943-2892509	110	28	109	32
		A.baumannii	Chromosome	37	DETAB-P39	GTTGTTCATCGCATAGATGATTTAGAAA	2906492-2907335	15	28	14	32	12269	I-Fa
						GTTCTTCATCGCATAGATGATTTAGAAA	2912886-2915286	41	28	40	32
		A.baumannii	Chromosome	38	E47	GTTCACTGCCGTATAGGCAGCTTAGAAA	430388-432578	37	28	36	32	2190	Orphan arrays
				39		GTTCATGGCGGCATACGCCATTTAGAAA	2822704-2828677	100	28	99	32	14245	I-Fb
		A.baumannii	Chromosome	40	Ex003	GTTCATGGCGGCATACGCCATTTAGAAA	1104615-1107884	55	28	54	32	11541	I-Fb
		A.baumannii	Chromosome	41	FDAARGOS_533	GTTCTTCATCGCATAGATGATTTAGAAA	360816-367256	108	29	107	31	15526	I-Fa
		A.baumannii	Chromosome	42	FDAARGOS_1036	GTTCATGGCGGCATACGCCATTTAGAAA	43445-46594	53	28	52	32	11421	I-Fb
		A.baumannii	Chromosome	43	HWBA8	GTTCATGGCGGCATACGCCATTTAGAAA	617123-620213	52	28	51	32	11704	I-Fb
		A.baumannii	Chromosome	44	MRSN 56	GTTCATGGCGGCATACGCCATTTAGAAA	2938930-2942139	54	28	53	32	11481	I-Fb
		A.baumannii	Chromosome	45	B8342	GTTCACTGCCGTATAGGCAGCTTAGAAA	1669387-1669834	8	28	7	32	447	Orphan arrays
		A.baumannii	Chromosome	46	OCU Ac18	GTTCTTCATCGCATAGATGATTTAGAAA	1062347-1064867	43	28	42	32	18121	I-Fb
						GTTCTTCATCGCATAGATGATTTAGAAA	1065975-1070985	84	28	83	32
						TTCATCGCATAGATGATTTAGAAA	1076845-1077048	4	24	3	32
				47		GTTCATGGCGGCATACGCCATTTAGAAA	2841532-2850989	158	28	157	32	18220	I-Fa
		A.baumannii	Chromosome	48	P7774	GTTCATGGCGGCATACGCCATTTAGAAA	40673-43763	52	28	51	32	11704	I-Fb
		A.baumannii	Chromosome	49	UPAB1	GTTCATGGCGGCATACGCCATTTAGAAA	465269-468119	48	28	47	32	11464	I-Fb
		A.baumannii	Chromosome	50	USA15	GTTCATGGCGGCATACGCCATTTAGAAA	3144133-3147162	51	28	50	32	11301	I-Fb
		A.baumannii	Chromosome	51	VB82	GTTCATGGCGGCATACGCCATTTAGAAA	2675872-2679143	55	28	54	32	11885	I-Fb
		A.baumannii	Chromosome	52	VB2486	GTTCATGGCGGCATACGCCATTTAGAAA	1121940-1125622	62	28	61	32	11954	I-Fb
		A.baumannii	Chromosome	53	WCHAB005078	GTTCATGGCGGCATACGCCATTTAGAAA	2790743-2793892	53	28	52	32	11421	I-Fb
		A.baumannii	Chromosome	54	WP4-W18-ESBL-11	GTTCATGGCGGCATACGCCATTTAGAAA	2874002-2877874	65	28	64	32	12144	I-Fb
		A.baumannii	Chromosome	55	XL380	GTTCGTCATCGCCCAGATGATTTAGAAA	876821-881703	82	28	81	32	14628	I-Fa
						GTTGTTCATCGCATAGATGATTTAGAAA	887256-888036	14	28	13	32
		A.baumannii	Chromosome	56	J9	TCATCGCCCAGATGATTTAGAAA	985859-987179	23	28	22	32	4831	Undefined
		A.baumannii	Chromosome	57	B8300	TTCATCGCATAGATGATTTAGAAA	552657-553041	7	24	6	36	12872	I-Fa
						GTTCTTCATCGCATAGATGATTTAGAAA	558780-562169	57	28	56	32
		A.baumannii	Plasmid	58	FDAARGOS_540-1-plasmid	GTTCACTGCCATGTAGGCAGCTTAGAAATG	35238-35447	4	30	3	30	209	Orphan arrays
		A.baumannii	Plasmid	59	OCU_Ac18-plasmid	GTTCACTGCCATGTAGGCAGCTTAGAAATG	41616-41825	4	30	3	30	209	Orphan arrays
		A. baumannii	Plasmid	60	DB053-plasmid	GTTGTTCATCGCATAGATGATTTAGAAA	46805-49288	42	28	41	32	7788	I-Fb
						GTTCGTCATCGCCCAAATGATTTAGAAA	54294-54593	6	28	5	32
		A.nosocomialis	Chromosome	61	AB6	GTTCTTCATCGCATAGATGATTTAGAAA	45773-50332	77	29	76	31	11145	I-Fa
						GTTGTTCATCGCATAGATGATTTAGAAA	55420-57980	27	28	26	32
		A.nosocomialis	Chromosome	62	AB7	GTTCTTCATCGCATAGATGATTTAGAAA	45773-50332	77	29	76	31	11145	I-Fa
						GTTGTTCATCGCATAGATGATTTAGAAA	55420-56980	27	28	26	32
		A.nosocomialis	Chromosome	63	AC13	GTTCTTCATCGCATAGATGATTTAGAAA	46456-50357	66	29	65	31	23747	I-Fa
						GTTGTTCATCGCATAGATGATTTAGAAA	55446-56406	17	28	16	32
		A.nosocomialis	Chromosome	64	AC15	GTTCTTCATCGCATAGATGATTTAGAAA	46456-50357	66	29	65	31	23747	I-Fa
						GTTGTTCATCGCATAGATGATTTAGAAA	55446-56345	17	28	16	31
		A.nosocomialis	Chromosome	65	AC25	GTTGTTCATCGCATAGATGATTTAGAAA	159633-160593	17	28	16	32	13172	I-Fa
						GTTCTTCATCGCATAGATGATTTAGAAA	165681-169584	66	28	65	32
		A.nosocomialis	Chromosome	66	AC1537	GTTCACTGCCGTATAGGCAGCTTAGAAA	40894-45004	69	28	68	32	27593	I-Fv
		A.nosocomialis	Chromosome	67	AC1781	GTTCTTCATCGCATAGATGATTTAGAAA	90197-95900	96	28	95	32	15226	I-Fa
						TCATCGCATAGATGATTTAGAAA	100988-102007	18	28	17	32
		A.nosocomialis	Chromosome	68	TG19596	GTTGTTCATCGCATAGATGATTTAGAAA	3641- 5229	27	28	26	32	1588	Orphan arrays
		A.nosocomialis	Chromosome	69	TUM15142	AGTTCTTCATCGCATAGATGATTTAGAAA	10318-11486	20	29	19	32	1168	Orphan arrays
		A.nosocomialis	Chromosome	70	TUM15284	GTTGTTCATCGCATAGATGATTTAGAAA	3641-5229	27	28	26	32	11206	I-Fa
						GTTCTTCATCGCATAGATGATTTAGAAAT	10319-11577	22	29	21	31
		A.nosocomialis	Chromosome	71	TUM15298	TTTCTAAATCATCTGGGCGATGAACAAC	3670-5230	27	28	26	32	11206	I-Fa
						AGTTCTTCATCGCATAGATGATTTAGAAA	10319-11577	22	29	21	31
		A.pittii	Chromosome	72	ANC_4050	TCATCGCATAGATGATTTAGAAA	138422-138852	8	23	7	38	6093	Undefined
						GTTGTTCATCGCATAGATGATTTAGAAA	139022-139205	4	28	3	33
						GTTTCTCATCGCTCAGATGATTTAGAAAA	139265-141154	34	28	33	32
		A.pittii	Chromosome	73	MCR53	GTTACTCATCGCATAGATGATTTAGAAA	77221-82108	82	28	81	32	30778	I-Fb
						GTTGTTCATCGTCCAGATGATTTAGCAA	87200-89327	36	28	35	32
		A.calcoaceticus	Chromosome	74	ACa13	GTTGCTCATCGCCCAGATGATTTAGAAA	3004204-3008791	77	28	76	32	13636	I-Fa
		A.calcoaceticus	Chromosome	75	DSM_30006	GTTACTCATCGCCCAGATGATTTAGAAA	1684795-1690033	88	28	87	32	14294	I-Fa
		A.calcoaceticus	Chromosome	76	GK1	GTTGCTCATCGCCCAGATGATTTAGAAA	52989-55237	38	28	37	32	3448	Orphan arrays
						GTTGCTCATCGCCCAGATGATTTAGAAA	55328-56437	19	28	18	32
				77		GTTGCTCATCGCCCAGATGATTTAGAAA	116-623	9	28	8	32	9540	I-Fa
		A.calcoaceticus	Chromosome	78	GK2	GTTCGTCATCGCCCAGATGATTTAGAAA	1-124	3	28	2	32	9233	I-Fa
						GTTCGTCATCGCCCAGATGATTTAGAAAAA	5245-5872	11	28	10	30
				79		GTTCGTCATCGCCCAGATGATTTAGAAA	45151-46268	21	28	18	32	1117	Orphan arrays
		A.calcoaceticus	Chromosome	80	JUb89	GTTCACTGCCGTATAGGCAGCTTAGAAA	109269-111200	31	28	30	30	1931	Orphan arrays
				81		GTTCACTGCCGTATAGGCAGCTTAGAAA	110325-110835	9	28	8	32	22245	I-Fv
				82		GTTCACTGCCGTATAGGCAGCTTAGAAA	28201-30572	40	28	39	32	2371	Orphan arrays
		A.calcoaceticus	Chromosome	83	KCTC_2357	GTTACTCATCGCCCAGATGATTTAGAAA	316573-322106	93	28	92	32	14594	I-Fa
		A.calcoaceticus	Chromosome	84	NCTC12983	GTTACTCATCGCCCAGATGATTTAGAAA	527753-533291	93	28	92	32	14139	I-Fa
		A.calcoaceticus	Chromosome	85	TG19588	GTTACTCATCGCCCAGATGATTTAGAAA	1274889-1280427	93	28	92	32	8931	I-Fa
						26
						56+26
						gttactcatcgcccagatgatttagaaaa		29
